# Supplementary material for: Three-dimensional microchanelled electrodes in flow-through configuration for bioanode formation and current generation
Source: Royal Society of Chemistry journal article supplement (doi:10.1039/c1ee01477c), 2011-01-01
Supplement: c1ee01477c.pdf [file c1ee01477c.pdf]

## “Three-Dimensional Microchanelled Electrodes In Flow-Through Configuration For Bioanode Formation And Current Generation.”

Krishna Katuri<sup>b</sup>, M. Luisa Ferrer<sup>\*a</sup>, María C. Gutiérrez<sup>a</sup>, Ricardo Jiménez<sup>a</sup>, Francisco del Monte<sup>a</sup>  
and Dónal Leech<sup>b\*</sup>

### Supplementary Information

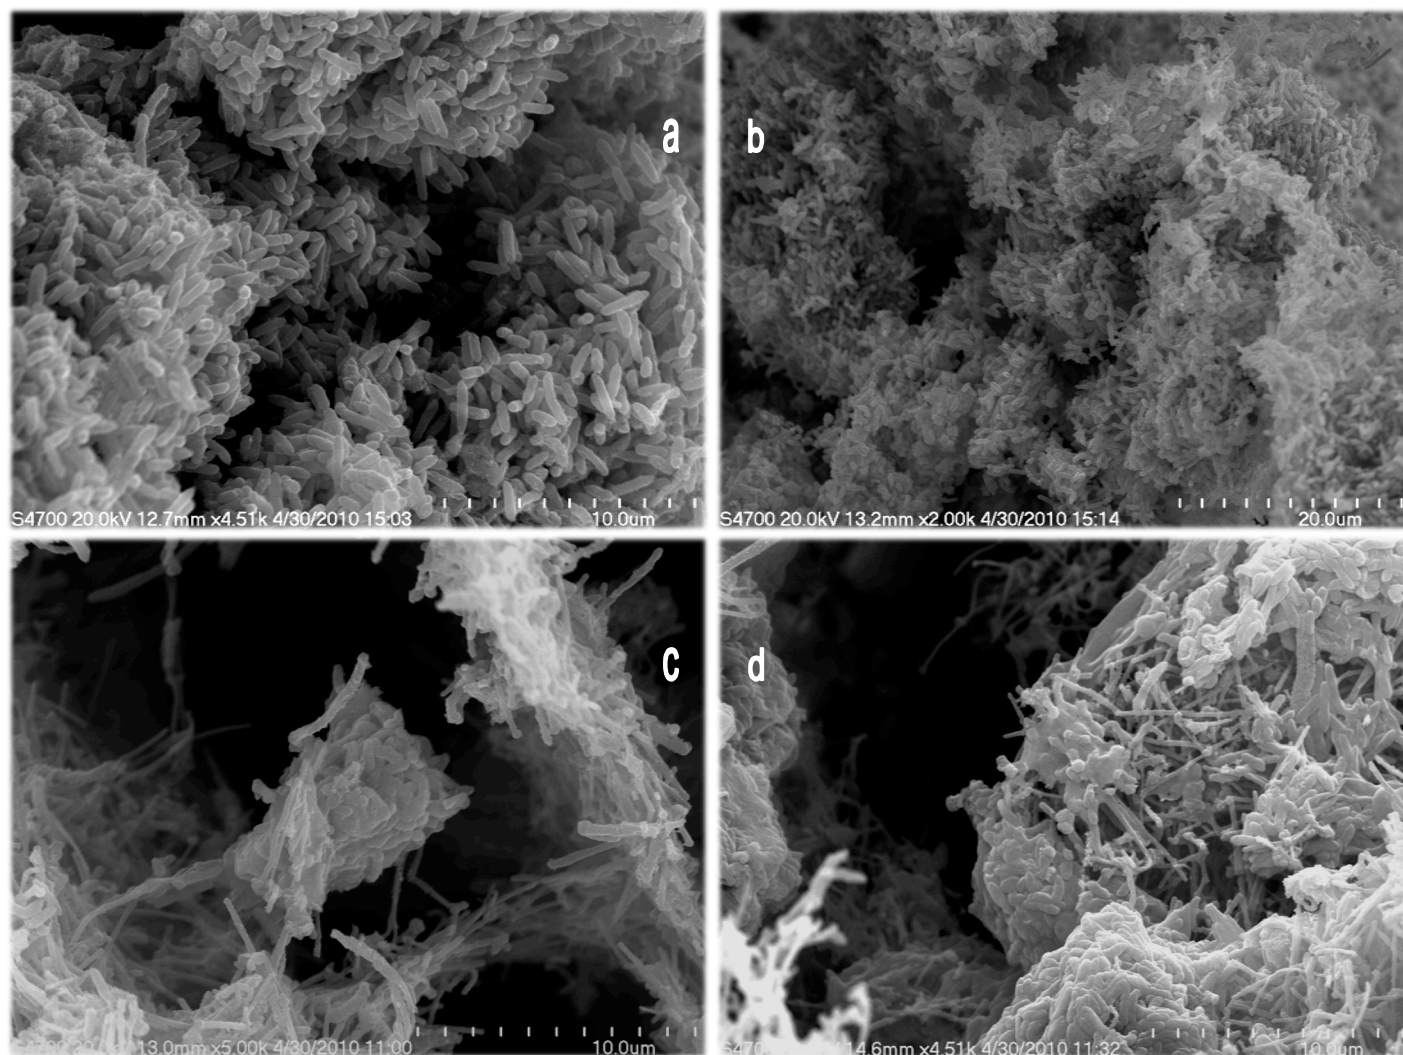

**Figure S1:** SEM images of *Gs* biofilms induced to grow for ~100 h in batch mode operation at 0 V vs Ag/AgCl applied potential on (a) graphite rod, (b) MWCNT/CHI coated graphite rod (2D electrode), and (c & d) inside the 3D MWCNT/CHI scaffold channels.

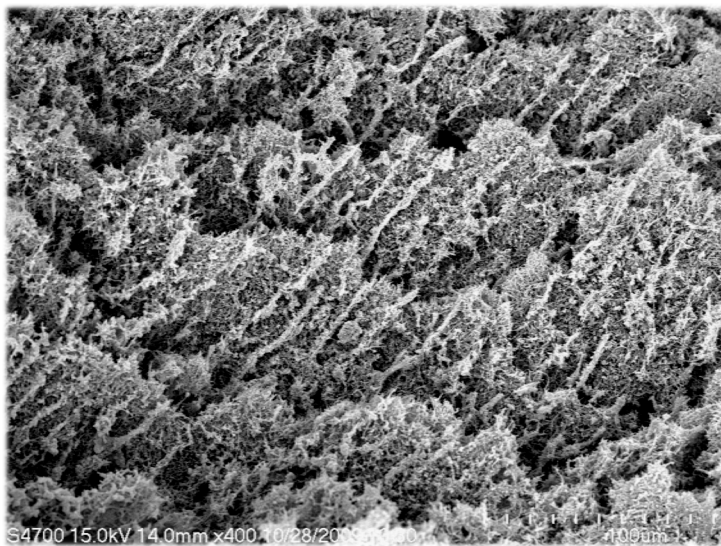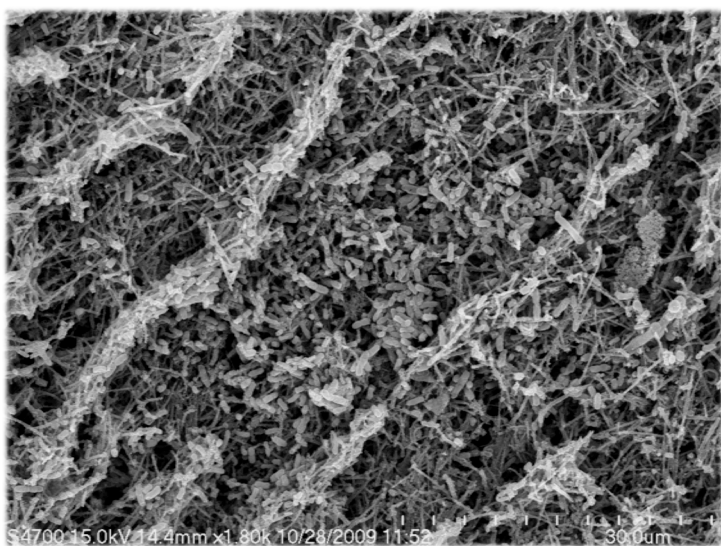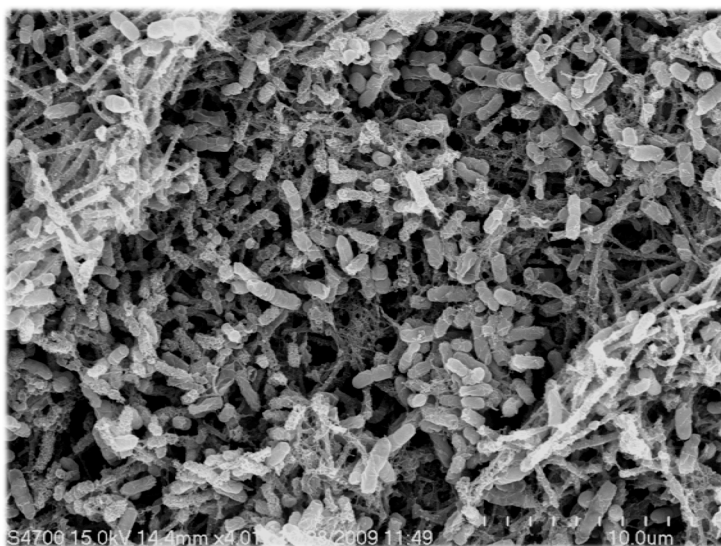

**Figure S2:** SEM images of the longitudinal section of *Gs* biofilm induced to grow in a 3D scaffold, pre-filled with *Gs*, at 0 V vs. Ag/AgCl, operated under flow of culture medium (10 mM acetate) for ~320 hrs.
